# Supplementary material for: Simulated revelation of the adsorption behaviours of acetylcholinesterase on charged self-assembled monolayers
Source: Royal Society of Chemistry journal article supplement (doi:10.1039/c9nr10123c), 2020-01-01
Supplement: c9nr10123c1.pdf [file c9nr10123c1.pdf]

Electronic Supplementary Information for

**Simulated revelation for the adsorption behaviours of  
acetylcholinesterase on charged self-assembled monolayers**

Shengjiang Yang<sup>a</sup>, Jie Liu<sup>b</sup>, He Zheng<sup>c</sup>, Jinyi Zhong<sup>c</sup> and Jian Zhou<sup>a\*</sup>

<sup>a</sup> School of Chemistry and Chemical Engineering, Guangdong Provincial Key Lab for

Green Chemical Product Technology, South China University of Technology,

Guangzhou 510640, P. R. China

<sup>b</sup> Key Laboratory for Green Chemical Process of Ministry of Education, School of

Chemical Engineering and Pharmacy, Wuhan Institute of Technology, Wuhan 430073,

P. R. China

<sup>c</sup> State Key Laboratory of NBC Protection for Civilian, Research Institute of Chemical

Defense, Academy of Military Science, Beijing 102205, P. R. China

---

\* Corresponding author. Tel./fax: +86 20 87114069.  
E-mail address: jianzhou@scut.edu.cn

**Table S1.** The adsorption residues of TcAChE adsorbed on charged surfaces.

| system                               | Contact residues (< 0.35 nm)                                                                                                                                     |
|--------------------------------------|------------------------------------------------------------------------------------------------------------------------------------------------------------------|
| TcAChE on NH <sub>2</sub> -SAM (7%)  | Tyr70, Asp72, Pro76, Gly77, Gly80, Glu82, Glu89,<br>Asn253, Lys269, Lys270, Gln272, Glu273, Asp276,<br>Val277, Tyr334, Ser340, Asp342, Ser343, Glu344, Lys346    |
| TcAChE on NH <sub>2</sub> -SAM (25%) | Asp72, Glu73, Pro76, Gly77, Asn253, Gln272, Glu273,<br>Asp276, Tyr334, Pro337, Gly338, Ser340, Asp342,<br>Ser343, Glu344, Lys346, Ser348, Glu350, Asp351, Asn382 |
| TcAChE on HOOC-SAM (7%)              | Lys107, Lys192, Arg220, Lys316, Gln318, Lys413,<br>Phe414, Asn416, Thr479, Asn481, Pro485, His486,<br>Ser487, Gln488, Lys491, Leu494, Thr496, Lys498, Glu499     |
| TcAChE on HOOC-SAM (25%)             | Lys107, Ser108, Gln185, Asp190, Lys192, Asp217,<br>Arg220, Arg221, Lys316, Gln318, Lys413, Phe414,<br>Asn416, Thr479, Pro485, His486, Thr497, Lys498             |

\*The positively charged, and negatively charged residues are colored in blue, and red, respectively

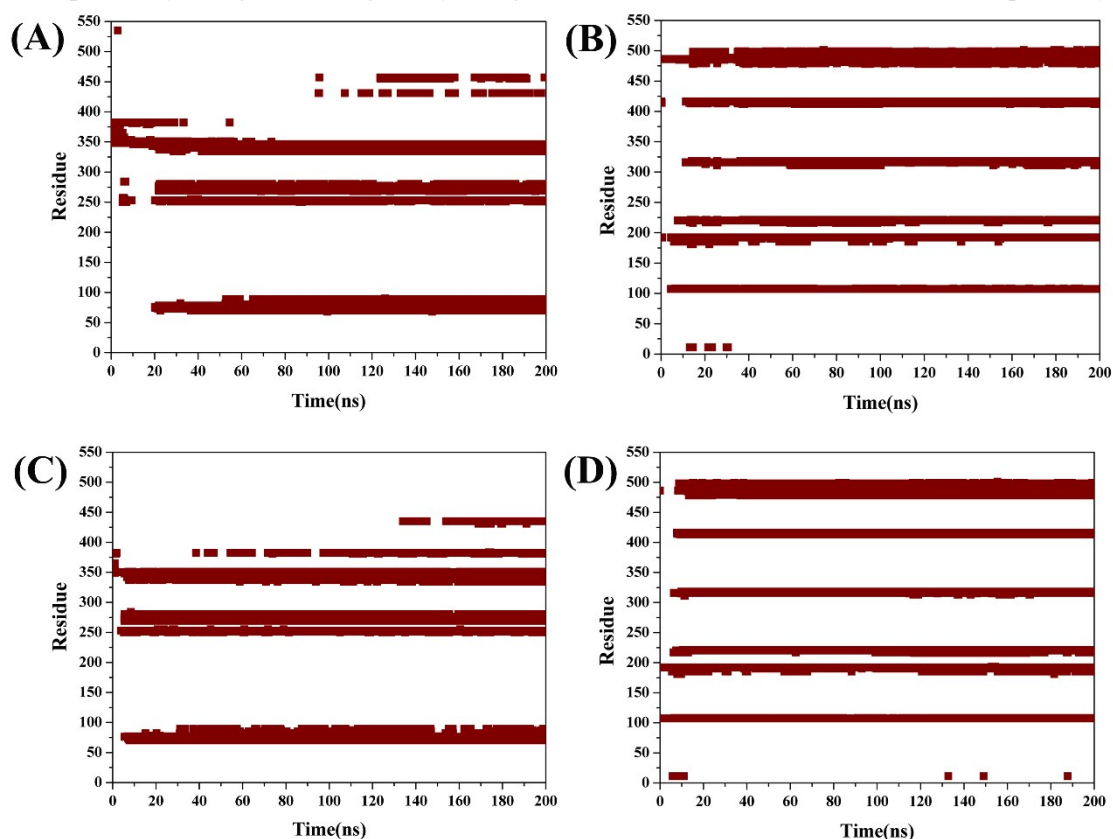

**Fig. S1.** Contact maps between TcAChE and charged SAMs during AAMD simulations: (A) 7% dissociated NH<sub>2</sub>-SAM; (B) 7% dissociated COOH-SAM; (C) 25% dissociated NH<sub>2</sub>-SAM; (D) 25% dissociated COOH-SAM.

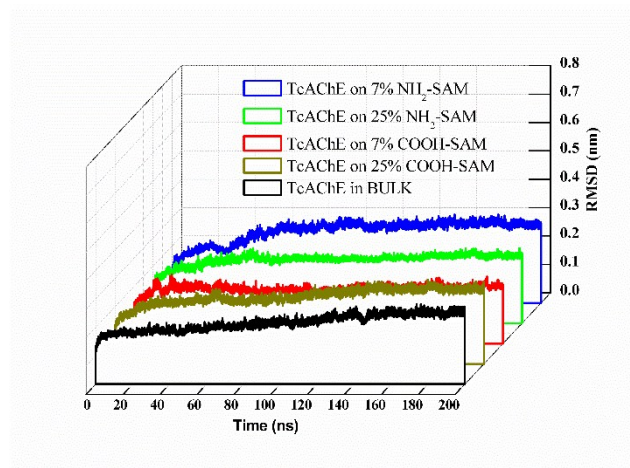

**Fig. S2.** The time evolution of RMSD during overall processes of AAMD simulations.

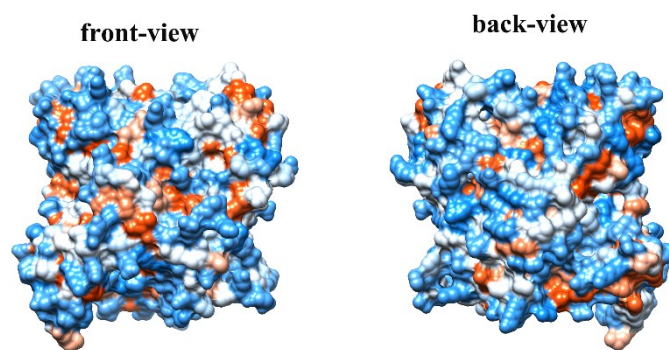

**Fig. S3.** The hydrophobicity maps of TcAChE are shown in front and back views: the surface color changes from the blue for the strongest polar residue to orange-red for the most hydrophobic residue, with the intermediate residues in white.
